# Supplementary material for: Improvement of Nutritional Quality of Tomato Fruit with Funneliformis mosseae Inoculation under Greenhouse Conditions
Source: MDPI journal article supplement (doi:10.3390/horticulturae9040448), 2023-03-30
Supplement: s1 [file s1]

Archive with 4 entries (4 files):
- Figure S1.pdf
- Figure S2.pdf
- Table S1.xlsx
- Table S2.xlsx
