# Supplementary material for: Improvement of Nutritional Quality of Tomato Fruit with Funneliformis mosseae Inoculation under Greenhouse Conditions
Source: MDPI journal article supplement (doi:10.3390/horticulturae9040448), 2023-03-30
Supplement: s1 [file s1 › Figure S1.pdf]

## Supplementary Figure S1

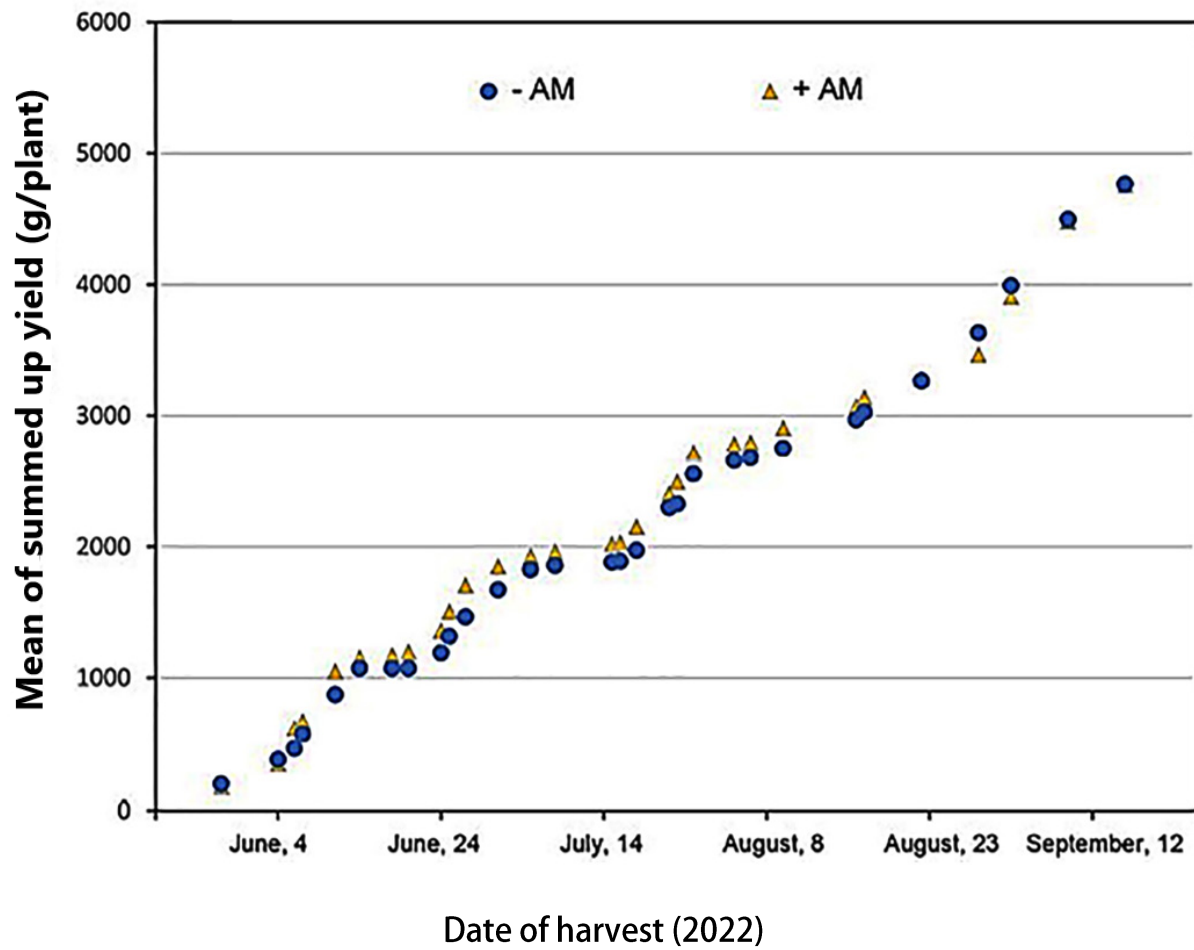

**Figure S1:** Yield of cv. Rio Grande/Nadir tomato plants grown in a commercial greenhouse at Kalar Kahar in 2022. Note that there is no difference between the yields of plants with and without mycorrhizae.
