# Supplementary material for: Improvement of Nutritional Quality of Tomato Fruit with Funneliformis mosseae Inoculation under Greenhouse Conditions
Source: MDPI journal article supplement (doi:10.3390/horticulturae9040448), 2023-03-30
Supplement: s1 [file s1 › Figure S2.pdf]

## Supplementary Figure S2

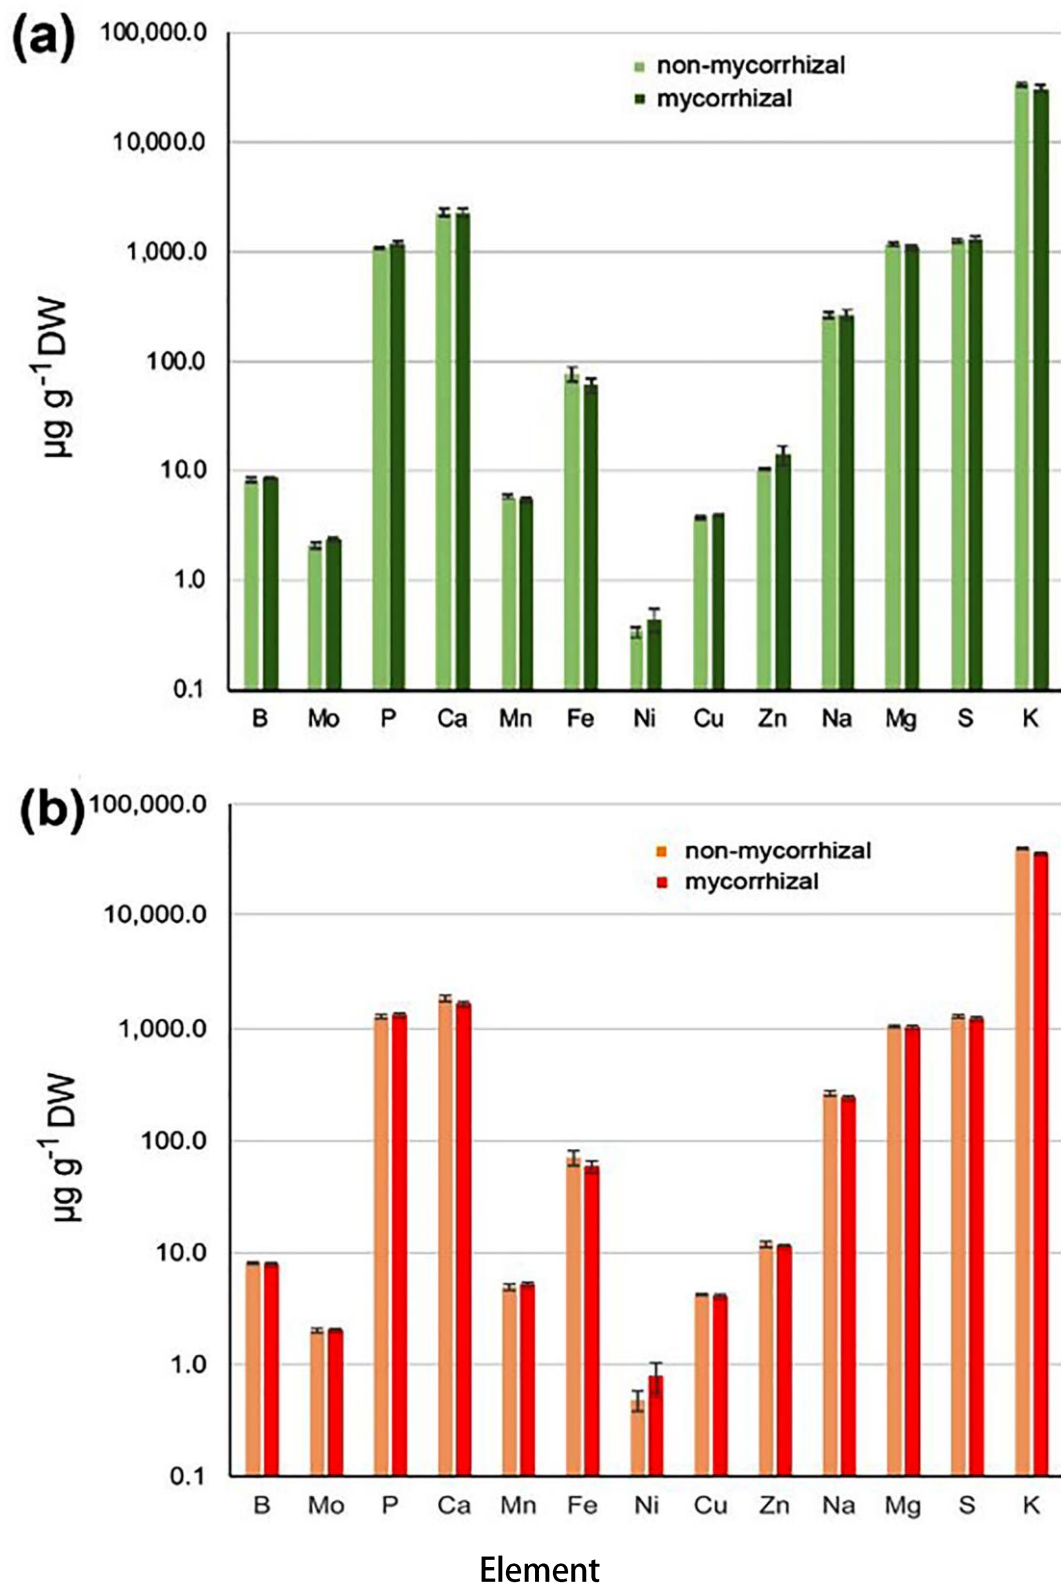

**Figure S2:** Mineral content of non-mycorrhizal (a) and mycorrhizal (b) green and red fruits. Note that there is no difference between the measured levels of all minerals. The values are presented as mean SD ( $n = 8$ )
