# Supplementary material for: Improvement of Nutritional Quality of Tomato Fruit with Funneliformis mosseae Inoculation under Greenhouse Conditions
Source: MDPI journal article supplement (doi:10.3390/horticulturae9040448), 2023-03-30
Supplement: s1 [file s1 › Table S1.xlsx]

## Sheet: Tabelle1
Supplemental Table S1: qRT-PCR primer sequences
SolycNr.	gene annotation	forward primer 5´--> 3´	reverse primer 5´--> 3´
Solyc02g084840.3	Dehydrin1	ATGGACATGGCGGTAGAAGG	CATGATGGCCTGGAAGCTTC
Solyc02g085590.3	Vicilin	AGGAGTGAAGAAGAGGCAGC	TCCGTTCATTTCAGGTTGGC
Solyc04g078300.3	MADS box TF	GTGTGAATGTCCCTGCTGG	AGGTTGTGACACTGGAAATGG
Solyc04g080910.1	ERF13	AACAGCTGATGATTATTCCGTTG	TCCTGGATCATTCACTGCTTC
Solyc05g053350.3	desiccation related	CTTTGTTGTACGAGCGAGGG	CCCTTCAGCACCCAACTTTG
Solyc06g069260.1	Oleosin	GATTCGGCGCGGTAGTAAC	CGCACCGGGAGCTGTATC
Solyc07g053750.1	Zinc finger TF 50	ACCCAATTCTTCAGCAGCAG	CGAAACAGGGCTAGCAGATG
Solyc07g064210.2	albumin seed storage	CGACGAGTTGAGCATGGTAAC	CCTTGTCTACCGCAATCCTG
Solyc10g078780.2	LEA4	CACACCACGGATCATACTGG	AGGGCCTTGAACCGTATCTC
Solyc10g080410.2	bZIP TF	ACACAAGAAGCTGAGGATGC	GAGGAAGGCTTCAACAGTGG
Solyc12g008430.2	malic enzyme	CGTTGGCTGGTCAAGTAACTG	CACCAAATCTGCAGGCTGAG
Solyc07g026650.3	ACO5	CTCGAAGGAACTTTGCAAAGC	AATCCCCTGACCAAATCTGG
Solyc10g049850	TIP41	GCTGCGTTTCTGGCTTAGG	ATGGAGTTTTTGAGTCTTCTGC
Solyc01g007940	aminotransferase	CGGAGGGCGCATATAATGAC	AACCCGGGACAGTAGAGATG
Solyc01g068410.3	PIN5	TATTCATGGCTTTGCGTGGG	GTCACTGCTTGGGGTAATGC
Solyc02g062770	LEA	TGTCAAGTAGCTATGGAGATGC	AGCCTTCTCCTTCTCTTTGAC
