# Supplementary material for: Improvement of Nutritional Quality of Tomato Fruit with Funneliformis mosseae Inoculation under Greenhouse Conditions
Source: MDPI journal article supplement (doi:10.3390/horticulturae9040448), 2023-03-30
Supplement: s1 [file s1 › Table S2.xlsx]

## Sheet: gr_AM_vs_gr_c.genes.significant
Supplementary Table S2a: According to RNAseq analysis using FPKM values (n = 4), log2 fold change (FC), and adjusted p-value, DEGs were found in green fruits (cv. Nadir) between mycorrhized (+AM) and non-mycorrhized (-AM) plants. Genes chosen for qPCR validation are highlighted in color.
gene annotation	SolycNr.	FPKM_mean_-AM	FPKM_mean_+AM	log2 FC	adj. p-value
Glyoxalase/bleomycin resistance protein	Solyc06g075990.3	0.13873	14.7945	6.84738	0.023658
malic enzyme	Solyc12g008430.2	0.0480444	5.04267	7.05946	0.0428028
2S albumin seed storage protein	Solyc07g064210.2	0.147596	16.7565	6.92125	0.0082905
tonoplast intrinsic protein 3.1	Solyc06g072130.3	0.182638	15.6494	6.50347	0.041803
unknown	Solyc05g016600.1	0.0664581	6.96372	6.9479	6.89975e-06
unknown	Solyc06g061110.2	0.0566492	7.25829	7.31356	0.00571501
Reductase 1	Solyc09g015070.3	0.0549996	11.1668	7.95789	0.00479964
Non-specific lipid-transfer protein	Solyc01g090350.3	0.331962	278.245	9.75615	0.00320086
Dehydrin 1	Solyc02g084840.3	0.0913489	41.3282	8.99081	0.00430463
11-beta-hydroxysteroid dehydrogenase-like	Solyc06g064650.3	0.0502117	3.57579	6.47841	0.00697451
Non-specific lipid-transfer protein	Solyc02g087910.2	0.197777	8.47818	6.43564	0.00389608
Group 3 LEA	Solyc09g008770.3	0.369215	18.7499	6.12247	0.0385551
Diacylglycerol O-acyltransferase	Solyc01g011430.3	0.0760134	4.49813	6.09006	0.0478226
Iron sulfur subunit of succinate dehydrogenase	Solyc04g055020.2	0.0357435	1.6255	5.98109	0.0434958
MADS-box transcription factor 1	Solyc04g078300.3	0.0293532	1.17266	5.92184	0.0297536
Anther protein	Solyc01g008940.2	0.0754914	3.87094	5.88601	0.0265855
unknown	Solyc06g069355.1	0.0541796	2.57195	5.868	0.00910188
unknown	Solyc12g098615.1	0.0697549	3.3759	5.8213	0.000838256
Alanine aminotransferase 2	Solyc01g007940.3	0.0612512	2.81871	5.78403	0.0439592
Glutamine synthetase	Solyc12g041870.2	0.0492294	1.51869	5.27924	0.0038755
11-beta-hydroxysteroid dehydrogenase-like	Solyc07g052270.3	0.0421604	1.73184	5.75521	0.0211389
GDSL esterase/lipase	Solyc09g063060.3	0.0278873	0.938979	5.71658	0.00320086
Vicilin	Solyc02g085590.3	0.27701	6.87664	5.2985	0.0484253
unknown	Solyc05g005865.1	0.0664092	2.74529	5.60732	0.0480307
unknown	Solyc06g076420.1	0.04537	1.64875	5.54772	0.00949459
X-intrinsic protein 1.5 (aquaporin)	Solyc10g054790.2	0.0532912	1.53503	5.15249	0.0478179
Transmembrane protein 34	Solyc07g042090.3	0.0264496	0.641089	5.28517	0.0217066
Zinc finger transcription factor 50	Solyc07g053750.1	0.14925	4.94427	5.15187	0.043087
O-methyltransferase	Solyc02g077530.2	0.0282236	0.550629	4.92062	0.0274544
BZIP transcription factor	Solyc10g080410.2	0.0272191	0.277921	5.26876	0.00371872
Remorin 2	Solyc10g017540.3	0.0509321	1.45992	5.15705	0.0274544
unknown	Solyc09g091380.1	0.0668501	1.66257	4.8725	0.0082905
Heat shock protein 70	Solyc01g099660.3	0.0313908	0.55474	4.69945	0.041803
DNA topoisomerase	Solyc05g005350.2	0.0400235	0.993976	5.05211	0.00495962
Auxin-repressed protein	Solyc03g006360.3	0.0243621	0.361038	4.65163	0.0458801
Desiccation-related protein	Solyc05g053350.3	0.567489	13.9913	4.90254	0.0420974
unknown	Solyc11g043115.1	0.153621	3.49303	4.60545	0.0385551
Endo-1 4-beta-xylanase	Solyc01g105500.3	0.0212206	0.315675	4.81985	0.0206978
Globulin-like protein	Solyc09g082360.3	0.0971111	2.01821	4.54009	0.00839459
unknowm	Solyc09g092690.3	0.0165335	0.167449	4.68031	0.0263112
unknown	Solyc12g041875.1	0.0487982	0.89405	4.52749	0.0385551
Lactoylglutathione lyase family protein	Solyc01g088010.1	0.13989	3.24289	4.64185	0.0494326
unknown	Solyc11g011100.1	0.0649424	1.24255	4.5031	0.0391124
DNA topoisomerase	Solyc05g005360.2	0.0429654	0.71622	4.44391	0.029692
Cytochrome P450	Solyc08g076250.2	0.0182248	0.190211	4.53517	0.0398864
Phospholipid diacylglycerol acyltransferase	Solyc11g066710.2	0.0268623	0.388469	4.53401	0.00479964
DNA topoisomerase	Solyc05g005370.2	0.0485911	0.828443	4.43077	0.0206978
Growth-regulating factor 4	Solyc03g082430.1	0.0323924	0.47799	4.41917	0.0465118
GDSL esterase/lipase	Solyc04g050570.3	0.0455365	0.704878	4.31874	0.00895587
unknowm	Solyc02g085960.1	0.0614869	1.0644	4.37198	0.0318028
Peptide transporter	Solyc03g113440.3	0.0236435	0.255797	4.23329	0.03947
unknowm	Solyc04g064600.1	0.063506	1.14005	4.4172	0.0303199
Vicilin-like protein	Solyc09g082350.1	0.255374	3.05223	4.30302	0.0238301
unknowm	Solyc09g091870.1	0.036906	0.536455	4.32379	0.0235725
unknowm	Solyc08g082780.2	0.0756665	1.31072	4.32273	0.0398864
PIN5	Solyc01g068410.3	0.0522099	0.785934	4.24485	0.0365855
unknown	Solyc01g068420.3	0.0336807	0.333918	3.82866	0.00705708
Glycosyltransferase-like protein	Solyc05g046110.3	0.0449099	0.44283	3.67432	0.0484253
Phosphatidylglycerol/-inositol transfer protein	Solyc10g081810.2	0.427065	3.98636	3.60562	0.03903
Lipid transfer protein	Solyc02g086310.1	26.6955	482.886	4.18245	0.00705708
ERF13	Solyc04g080910.1	0.0596778	0.995762	4.28058	0.0391124
Zinc finger-homeodomain protein 1	Solyc02g067310.3	0.0834306	0.635485	3.11029	0.0272735
Transmembrane protein 205	Solyc06g065050.2	1.41921	5.01713	1.83203	0.0274544
ELF4-like protein	Solyc06g051680.1	1.11837	3.50928	1.66562	0.0307655
Oleosin Bn-V	Solyc06g069260.1	0.261817	2.81489	4.1764	0.0235725
unknown	Solyc04g056380.3	0.899156	3.86872	2.27544	0.00705708
Non-histone chromosomal protein 6	Solyc01g100620.2	0.0810435	0.500265	2.82361	0.00705708
unknown	Solyc03g113510.2	0.750496	3.8135	2.36448	0.00430463
Universal stress protein	Solyc01g100370.3	47.4156	27.1839	-0.799543	0.0459592
ACC-Oxidase 5	Solyc07g026650.3	10.1875	4.424	-1.18935	0.0475224
unknown	Solyc09g075600.2	9.38732	16.4506	0.810794	0.0073189
Class IV heat shock protein	Solyc01g102960.3	6.28581	14.3085	1.18851	0.0342389
Small heat shock protein	Solyc11g020330.1	5.33702	11.5747	1.12008	0.0349843
unknown	Solyc06g076310.1	0.157259	6.32675	5.43142	0.000490306
LEA	Solyc02g062770.2	0.137295	11.5225	6.59026	0.0498864
unknown	Solyc07g064790.3	0.172286	21.1537	7.02884	0.0082905
Late embryogenesis abundant protein (LEA) 4	Solyc10g078780.2	0.0635123	5.6743	6.73156	0.023658
Xylanase inhibitor	Solyc01g080000.1	0.0471147	2.00231	5.75821	0.0206978
Growth regulator like protein	Solyc07g008290.3	0.0646822	5.91295	6.75635	0.00538891
GDSL esterase/lipase	Solyc11g043110.2	0.063799	2.82178	5.71372	0.000838256

## Sheet: r_AM_vs_r_c.genes.significant
Supplementary Table S2b: RNAseq analysis with FPKM values (n = 4), log2 fold change (FC), and adjusted p-value revealed DEGs in red fruits (cv. Nadir) between mycorrhized (+AM) and non-mycorrhized (-AM) plants.
gene annotation	SolycNr.	FPKM_mean_-AM	FPKM_mean_+AM	log2 FC	adj. p-value
Acyl-desaturase	Solyc11g008680.2	19.3854	34.2176	0.827035	0.000788082
unknown	Solyc04g005255.1	56.0759	83.8479	0.590076	0.00923896
unknown	Solyc09g009880.3	24.7268	33.8899	0.465096	0.0196605
WVD2-like 4	Solyc10g081730.2	11.3548	15.9392	0.500081	0.0213291
unknown	Solyc08g007320.3	11.734	16.3806	0.491642	0.0216292
Transmembrane 9 superfamily protein member 4	Solyc06g062590.3	70.123	97.2165	0.481578	0.0216825
Aldehyde dehydrogenase 1	Solyc02g086970.3	60.8356	95.345	0.658327	0.0263771
Urease accessory protein	Solyc02g070670.3	55.2823	75.9679	0.468906	0.0360941
unknown	Solyc08g081310.3	9.68594	13.8917	0.533698	0.037184
Malonyl CoA-acyl carrier protein transacylase	Solyc01g006980.3	17.5488	24.0353	0.465365	0.0382738
Aspartate aminotransferase	Solyc07g032740.3	95.3762	130.581	0.462447	0.0362738
Non-lysosomal glucosylceramidase	Solyc01g103230.3	9.80033	14.1536	0.543811	0.0404442
DNA mismatch repair protein MutS, type 2	Solyc02g078390.3	137.11	194.949	0.529793	0.0414342
Diphosphate--fructose-6-phosphate 1-phosphotransferase	Solyc04g082880.3	111.514	158.848	0.52422	0.0414342
Histidine decarboxylase	Solyc08g066260.3	67.2708	102.345	0.617247	0.0414342
Poly(U)-specific endoribonuclease-A	Solyc08g077510.3	33.9902	45.9521	0.445123	0.0414342
Shikimate dehydrogenase	Solyc10g038080.2	18.6586	29.6362	0.67858	0.0414342
Pyruvate decarboxylase	Solyc10g076510.2	335.838	468.163	0.489256	0.0414342
unknown	Solyc01g104685.1	266.327	355.38	0.426177	0.0448105
unknown	Solyc03g121010.3	6.57044	9.90066	0.591287	0.0439105
ABI3-interacting protein 2	Solyc04g008840.3	6.51681	9.98647	0.475803	0.0439105
β-D-glucosidase	Solyc04g015560.3	12.1768	16.9053	0.48668	0.0439105
Spermidine synthase	Solyc04g026030.3	24.2823	32.5687	0.4351	0.0439105
glucose-6-phosphate isomerase	Solyc04g076090.3	11.1401	15.5155	0.491634	0.0439105
Argininosuccinate synthase	Solyc05g012270.3	35.9489	48.8207	0.45527	0.0439105
Choline dehydrogenase	Solyc06g062600.3	24.9588	39.8624	0.687646	0.0439105
Yip1 domain containing protein	Solyc07g018210.3	11.7028	18.4181	0.675874	0.0448105
UDP-N-acetylmuramoyl-L-alanyl-D-glutamate-- 2, 6-diaminopimelate ligase	Solyc08g081170.3	14.8052	21.4289	0.55256	0.0439105
LUMINIDEPENDENS-like protein	Solyc09g074690.3	9.43741	12.5412	0.481549	0.0438305
Thioredoxin domain-containing protein 9	Solyc11g012730.2	20.6343	28.03	0.458422	0.0438305
Leucine-rich repeat receptor-like protein kinase	Solyc02g070910.2	8.92315	12.8874	0.555475	0.0448184
Pathogenesis-related protein-like	Solyc02g031950.3	277.447	444.798	0.691949	0.0449542
AAA-type ATPase family protein	Solyc06g071990.3	24.3536	34.6979	0.532194	0.0448842
unknown	Solyc11g045440.1	19.4739	31.3991	0.714031	0.0448742
tRNA-dihydrouridine synthase A	Solyc01g087320.3	5.61493	7.6628	0.500905	0.0457462
P58IPK	Solyc09g007630.3	7.97198	10.9476	0.46991	0.0459162
Hydroxyacylglutathione hydrolase 2	Solyc06g053310.3	84.5559	110.795	0.403293	0.0472392
Uncharacterized mitochondrial protein	Solyc10g048060.1	49.3427	77.4296	0.665891	0.0472392
FAD linked oxidase family protein	Solyc11g045390.2	8.93289	12.2132	0.477126	0.0472392
ABC-1 domain protein	Solyc08g074280.3	4.4117	5.85767	0.451824	0.0476991
Pectin acetylesterase	Solyc10g038130.2	8.52869	11.7567	0.524624	0.0477991
RNA-binding protein 25	Solyc05g005620.3	16.6486	23.3868	0.517674	0.0489476
Inositol 1 4 5-trisphosphate 5-phosphatase	Solyc08g007080.3	22.5271	34.0891	0.620472	0.0499476
Myb family transcription factor	Solyc09g072830.3	33.4487	44.4292	0.427887	0.0469476
KDEL-tailed cysteine endopeptidase	Solyc03g111730.3	35.6296	53.2645	0.591443	0.0492451
Ran protein 2b	Solyc01g104700.3	584.678	759.799	0.388033	0.0493835
Asparagine synthase	Solyc04g055200.3	23.12	31.1902	0.437939	0.0494835
Cell division protein ftsZ	Solyc09g009430.3	31.2459	42.922	0.46561	0.0495835
unknown	Solyc07g047700.3	5.07729	9.51429	0.917365	5.81657e-10
Acidic endochitinase	Solyc02g082920.3	38.371	13.4893	-1.51658	0.00026278
Pathogenesis-related protein P2	Solyc01g097240.3	112.574	55.3587	-1.03323	0.000482441
